# Supplementary material for: Hydrological controls on temporal contributions of three nested forested subcatchments to the export of dissolved organic carbon
Source: Copernicus journal article supplement (doi:10.5194/hess-29-2377-2025), 2025-06-06
Supplement: Supplementary file 1 [file hess-29-2377-2025-supplement.pdf]

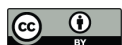

*Supplement of*

## **Hydrological controls on temporal contributions of three nested forested subcatchments to the export of dissolved organic carbon**

**Katharina Blaurock et al.**

*Correspondence to:* Luisa Hopp ([luisa.hopp@uni-bayreuth.de](mailto:luisa.hopp@uni-bayreuth.de))

The copyright of individual parts of the supplement might differ from the article licence.

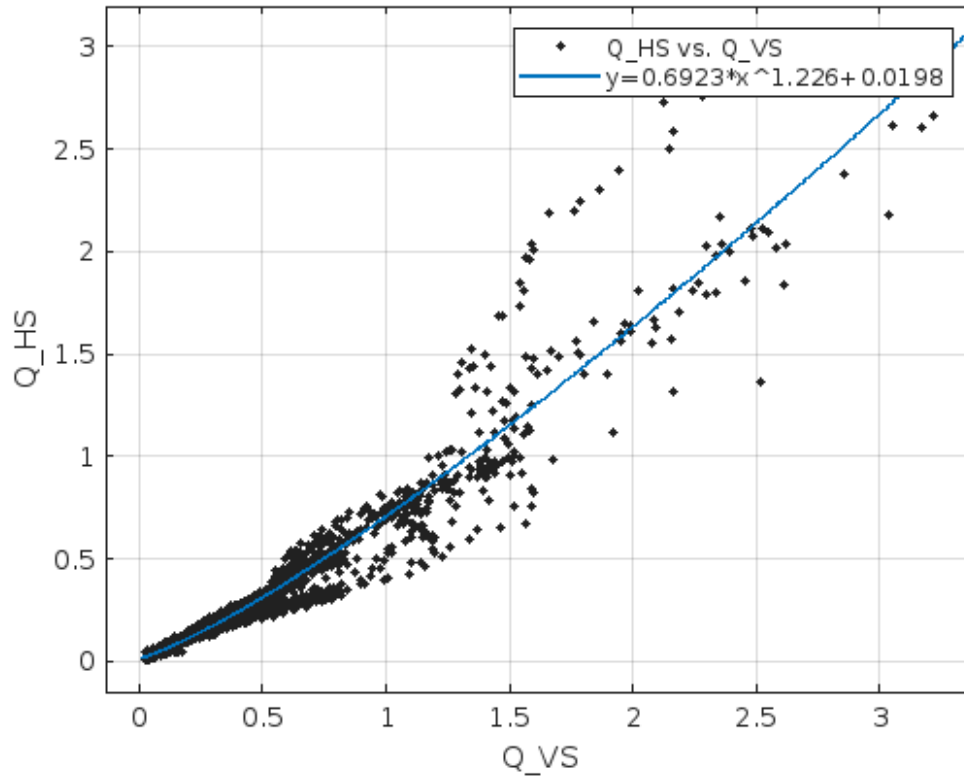

**Figure S1: Relationship between the discharge (in  $\text{m}^3 \text{s}^{-1}$ ) of the catchment Vorderer Schachtenbach ( $Q_{VS}$ ) and the catchment Hinterer Schachtenbach ( $Q_{HS}$ ), which was used for the gap filling of missing discharge data at Hinterer Schachtenbach from August 1<sup>st</sup> to September 3<sup>rd</sup>, 2020 ( $R^2 = 0.94$ ). The relationship was established using data from August 2019 to July 2020.**

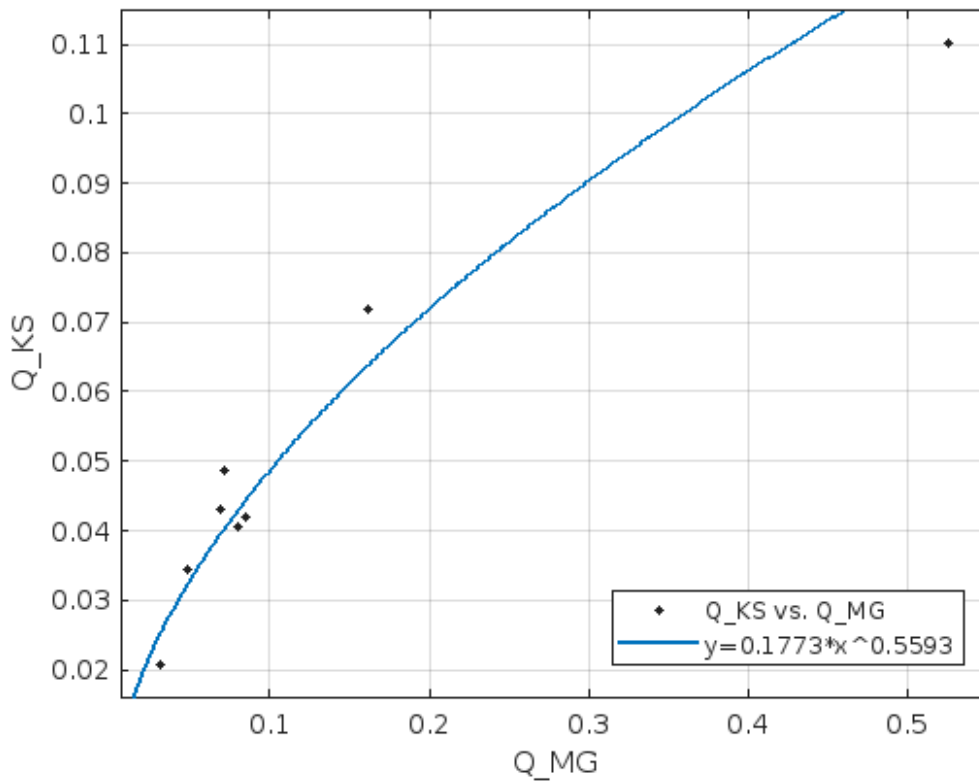

**Figure S2: Relationship of discharge (in  $\text{m}^3 \text{s}^{-1}$ ) at MG ( $Q_{MG}$ ) and KS ( $Q_{KS}$ ), which was measured at KS via tracer dilution on eight occasions between April and December 2021 ( $R^2 = 0.95$ ).**

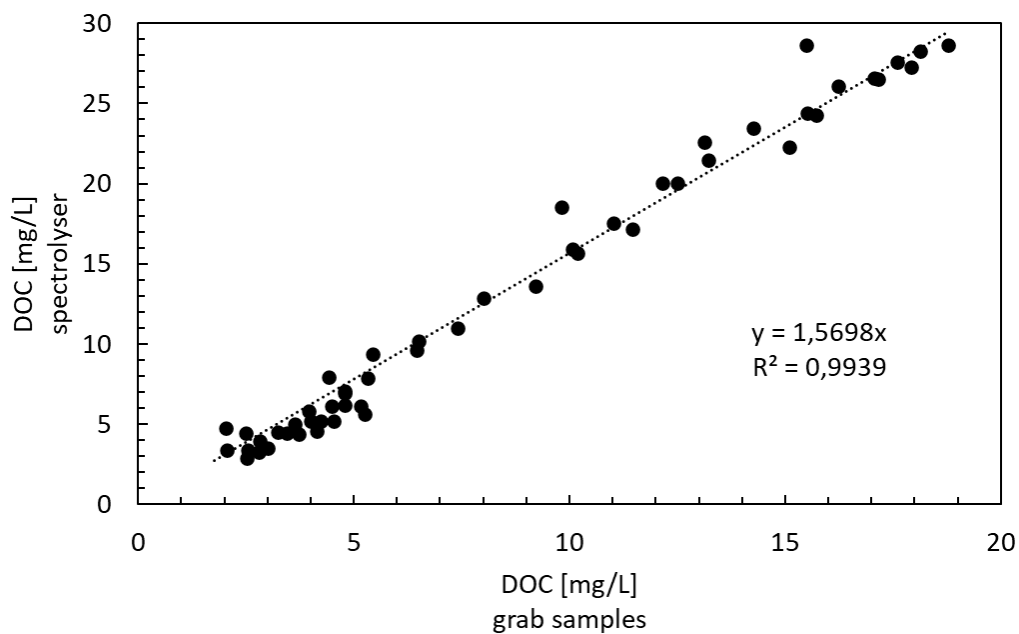

Figure S3: Correction factor used for the DOC concentrations measurements made by UV-Vis spectrophotometer D1 using grab stream samples at various discharge conditions (n = 52).

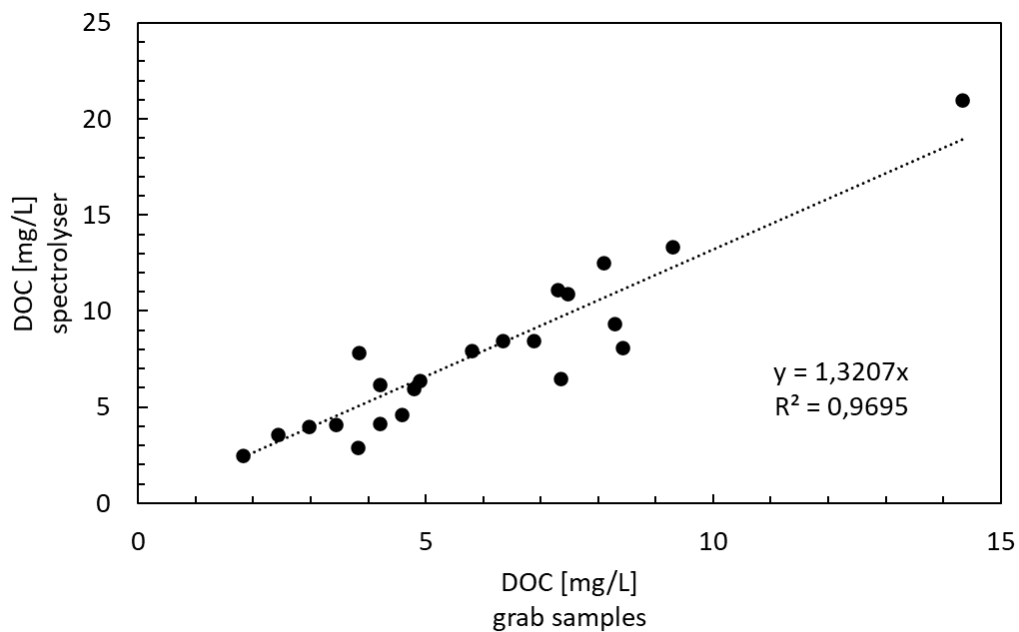

Figure S4: Correction factor used for the DOC concentrations measurements made by UV-Vis spectrophotometer D2 using grab stream samples at various discharge conditions (n = 22).

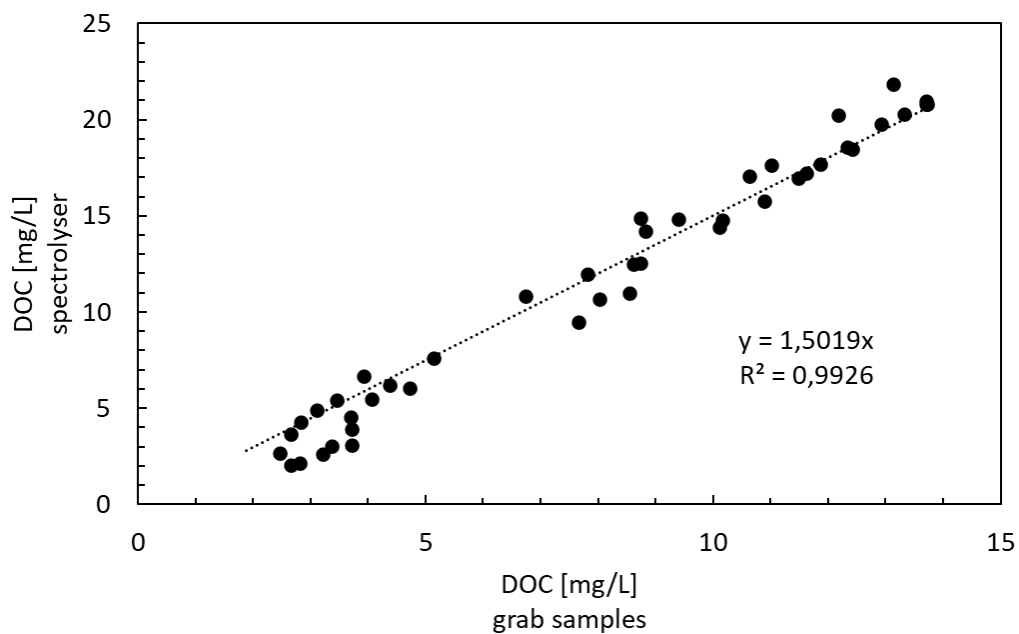

25 **Figure S5: Correction factor used for the DOC concentrations measurements made by UV-Vis spectrophotometer D3 using grab stream samples at various discharge conditions (n =44).**

30 **Table S1: Percentages of total time, total runoff generated and total DOC export for the catchment HS<sub>tot</sub> per hydrological period.**

|          | %time | %runoff | %DOC export |
|----------|-------|---------|-------------|
| Spring   | 17    | 22      | 26          |
| Summer   | 24    | 12      | 11          |
| Autumn   | 16    | 14      | 21          |
| Winter   | 17    | 9       | 4           |
| Snowmelt | 26    | 43      | 38          |

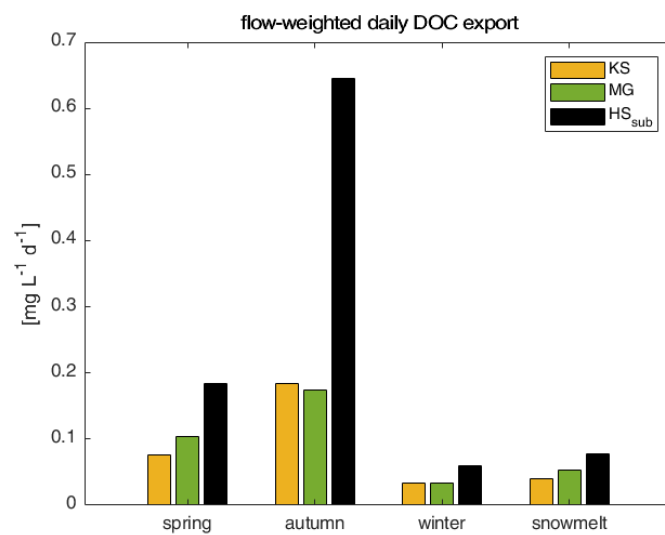

35 **Figure S6: Mean daily flow-weighted DOC export from the subcatchments KS, MG and HS<sub>sub</sub> during the different hydrological periods.**
